# Supplementary material for: Preparation and Application of Water-in-Oil Emulsions Stabilized by Modified Graphene Oxide
Source: MDPI journal article supplement (doi:10.3390/ma9090731), 2016-08-26
Supplement: s1 [file s1]

# Supplementary Materials: Preparation and Application of Water-in-Oil Emulsions Stabilized by Modified Graphene Oxide

Xiaoma Fei, Lei Xia, Mingqing Chen, Wei Wei, Jing Luo and Xiaoya Liu

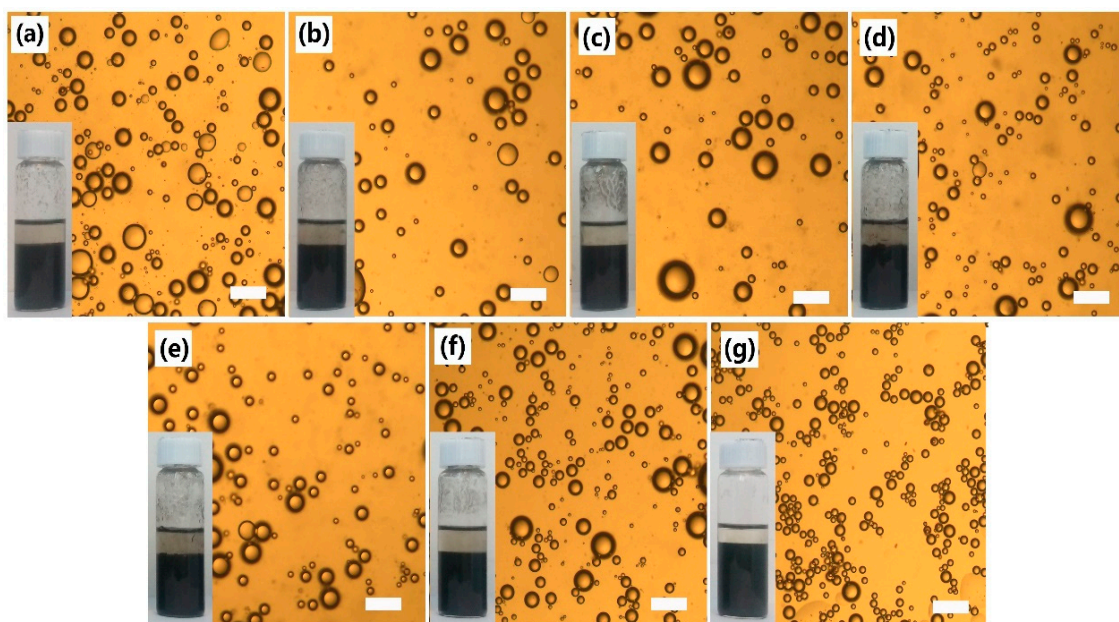

**Figure S1.** Optical micrographs and photographs after 72 h preparation of pickering emulsions stabilized by AmGO18-1 at different pH values: (a) pH = 1; (b) pH = 3; (c) pH = 5; (d) pH = 7; (e) pH = 9; (f) pH = 11 and (g) pH = 13. AmGO18-1 concentration: 1 mg/mL. Toluene/water ratio: 1:1. Scale bar: 100  $\mu$ m.

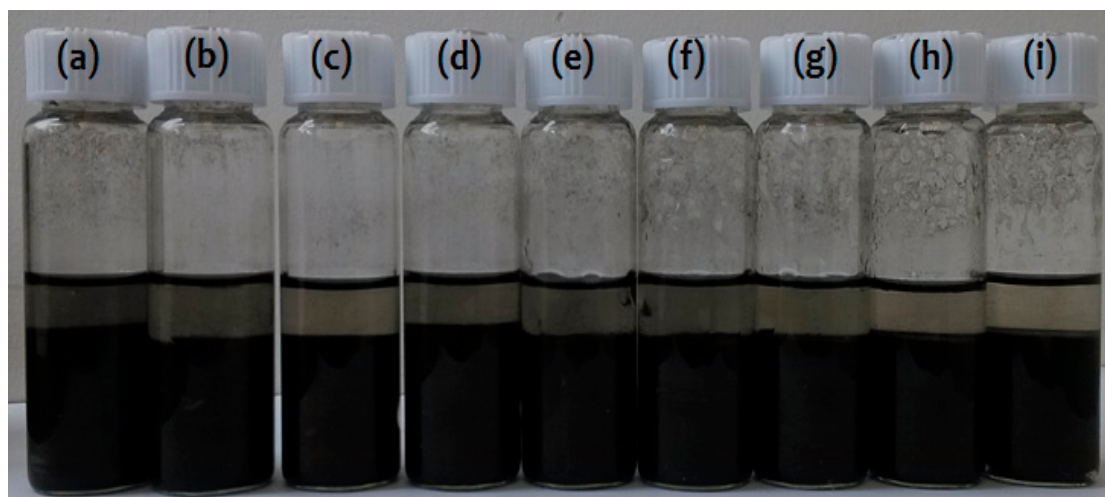

**Figure S2.** Photographs 72 h after preparation of pickering emulsions stabilized by AmGO18-1 with different NaCl concentrations. The concentrations of NaCl (mM) are (a) 0.1; (b) 1; (c) 10; (d) 20; (e) 50; (f) 100; (g) 300; (h) 500; and (i) 1000. AmGO18-1 concentration: 1 mg/mL. Toluene/water ratio: 1:1.

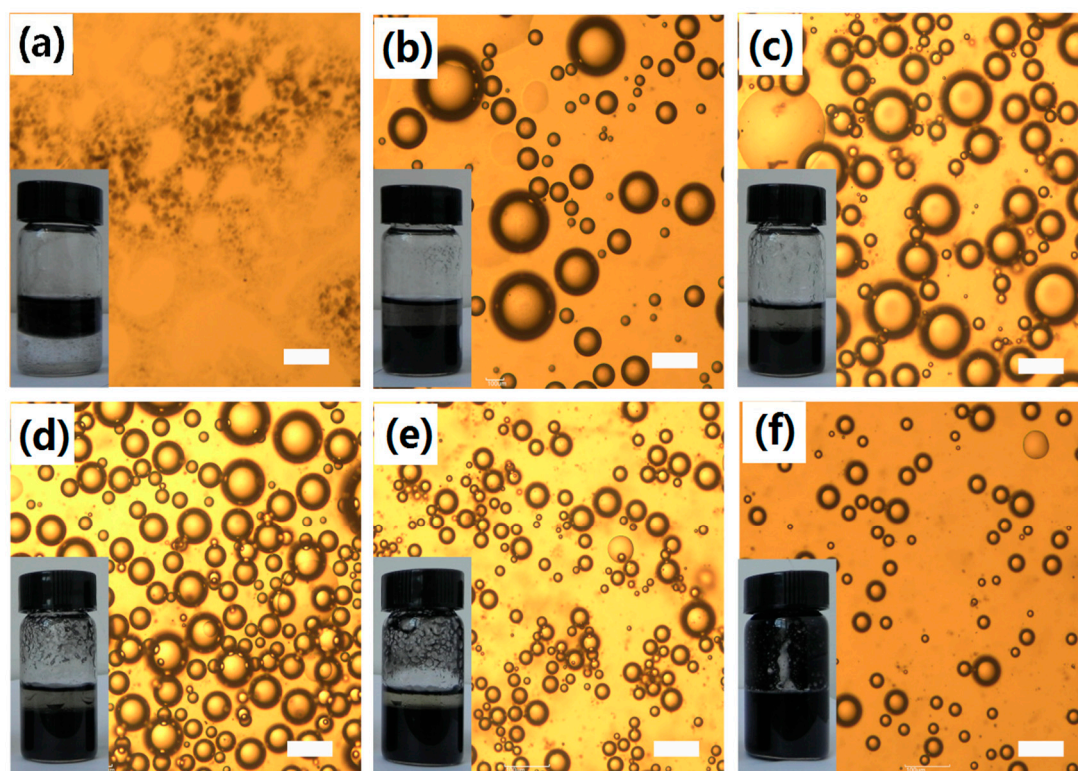

**Figure S3.** Optical micrographs and photographs after 72 h preparation of pickering emulsions stabilized by AmGO18-1 at different AmGO18-1 concentrations: (a) 0.1; (b) 0.2; (c) 0.5; (d) 1; (e) 2; (f) 4 mg/mL. Toluene/water ratio: 1:1. Scale bar: 100  $\mu\text{m}$ .
